# Supplementary material for: Effect of newborn genomic screening for lysosomal storage disorders: a cohort study in China
Source: Springer Nature journal article supplement (doi:10.1186/s13073-025-01483-z), 2025-05-12
Supplement: MOESM1 [file 13073_2025_1483_MOESM1_ESM.pdf]

## **Additional file 1**

**Table S1: 38 positive samples for other diseases.**

| N                              | Disease                                        | Genotype            | Location  | Gender | Pathogenetic | Biochemical indicator <sup>a</sup> |
|--------------------------------|------------------------------------------------|---------------------|-----------|--------|--------------|------------------------------------|
| o. (Gene, Inheritance pattern) |                                                |                     |           |        |              |                                    |
| 1                              | Hyperphenylalaninemia ( <i>PAH</i> , AR)       | c.721C>T/ c.1045T>G | EX7/EX10  | female | P/LP         | PHE=152.46                         |
| 2                              |                                                | c.532G>A/c.505C>A   | EX6/EX4   | female | LP/LP        | PHE=89.09                          |
| 3                              |                                                | c.1238G>C/c.722delG | EX12/EX7  | male   | P/P          | PHE=538.43                         |
| 4                              |                                                | c.482T>C/c.158G>A   | EX5/EX2   | male   | LP/VUS       | PHE=158.67                         |
| 5                              |                                                | c.1238G>C/c.158G>A  | EX12/EX2  | female | P/VUS        | PHE=98                             |
| 6                              |                                                | c.331C>T/c.482T>C   | EX3/EX5   | male   | P/LP         | PHE=581.68                         |
| 7                              |                                                | c.320A>G/c.721C>T   | EX3/EX7   | female | LP/P         | PHE=185.68                         |
| 8                              |                                                | c.1174T>A/c.1238G>C | EX11/EX12 | female | LP/P         | PHE=156.03                         |
| 9                              |                                                | c.611A>G/c.158G>A   | EX6/EX2   | female | P/VUS        | PHE=127.92                         |
| 10                             |                                                | c.442-1G>A/c.975C>G | IVS4/EX10 | male   | P/P          | PHE=625                            |
| 11                             | Congenital                                     | c.2048G>T/c.2654G>A | EX17/EX20 | male   | LP/P         | TSH=14.62                          |
| 12                             | hypothyroidism                                 | c.2635G>A/c.2654G>A | EX20/EX20 | female | P/P          | TSH=4.68 <sup>b</sup>              |
| 13                             | ( <i>DUOX2</i> , AR)                           | c.2654G>T/c.3329G>A | EX20/EX25 | male   | LP/LP        | TSH=8.76                           |
| 14                             | Ornithine                                      | c.385C>T/-          | EX4/-     | male   | LP           | CIT=12.91                          |
| 15                             | transcarbamylase deficiency ( <i>OTC</i> , XL) | c.148G>A/-          | EX2/-     | female | LP           | CIT=15.47                          |

|    |                                                                                                     |                         |          |        |       |            |
|----|-----------------------------------------------------------------------------------------------------|-------------------------|----------|--------|-------|------------|
| 16 | 2-<br><br>methylbutyrylglyci<br><br>nemia ( <i>ACADSB</i> ,<br><br>AR)                              | c.655G>A/ c.655G>A      | EX5/EX5  | female | LP/LP | C5=0.38 °  |
| 17 | Very long chain<br><br>acyl-CoA<br><br>dehydrogenase<br><br>deficiency<br><br>( <i>ACADVL</i> , AR) | c.1406G>A/c.637G>A      | EX14/EX8 | male   | LP/LP | C14:1=2.96 |
| 18 | Glucose-6-                                                                                          | c.1024C>T/-             | EX9/-    | male   | LP/-  | EA = 2.51  |
| 19 | phosphate                                                                                           | c.1376G>T/-             | EX12/-   | male   | LP/-  | EA=0.92    |
| 20 | dehydrogenase                                                                                       | c.1024C>T/-             | EX9/-    | male   | LP/-  | EA=2.00    |
| 21 | deficiency ( <i>G6PD</i> ,                                                                          | c.392G>T/-              | EX5/-    | male   | P/-   | EA=2.30    |
| 22 | XL)                                                                                                 | c.1376G>T/-             | EX12/-   | male   | LP/-  | EA=0.49    |
| 23 |                                                                                                     | c.1360C>T/-             | EX11/-   | male   | LP/-  | EA=0.40    |
| 24 |                                                                                                     | c.1388G>A/-             | EX12/-   | male   | LP/-  | EA=1.72    |
| 25 |                                                                                                     | c.95A>G/-               | EX2/-    | male   | LP/-  | EA=0.76    |
| 26 |                                                                                                     | c.1388G>A/-             | EX12/-   | male   | LP/-  | EA=0.73    |
| 27 | Glycogen storage                                                                                    | c.2051delG/-            | EX19/-   | male   | LP/-  | -          |
| 28 | disease IX d                                                                                        | c.2218C>T/-             | EX20/-   | male   | LP/-  | -          |
| 29 | ( <i>PHKA1</i> , AR)                                                                                | c.1989_1990delinsAAGTTG | EX19/-   | male   | P/-   | -          |

|                 |                                                            |                                     |                  |        |          |   |
|-----------------|------------------------------------------------------------|-------------------------------------|------------------|--------|----------|---|
| CTCGTGATCTAAA/- |                                                            |                                     |                  |        |          |   |
| 30              |                                                            | c.748_749insT/-                     | EX8/-            | male   | LP/-     | - |
| 31              |                                                            | c.1039C>T/-                         | EX10/-           | male   | LP/-     | - |
| 32              |                                                            | c.1989_1990delinsAAGTTG             | EX19/-           | male   | P/-      | - |
| CTCGTGATCTAAA/- |                                                            |                                     |                  |        |          |   |
| 33              |                                                            | c.2091C>A/-                         | EX19/-           | male   | LP/-     | - |
| 34              | Duchenne muscular                                          | EX49_51 DEL/-                       | EX49_51/-        | male   | P/-      | - |
| 35              | dystrophy ( <i>DMD</i> ,<br>XLR)                           | EX1_9 DUP/-                         | EX1_9/-          | male   | VUS/-    | - |
| 36              | Hepatolenticular                                           | c.2804C>T/ c.2297C>T                | EX12/EX8         | male   | LP/LP    | - |
| 37              | degeneration<br>( <i>ATP7B</i> , AR)                       | [c.588C>A, c.3316G>A]/<br>c.2333G>T | EX2,<br>EX15/EX8 | male   | LP, LP/P | - |
| 38              | Hereditary fructose<br>intolerance<br>( <i>ALDOB</i> , AR) | c.10C>T/c.524C>A                    | EX2/EX5          | female | P/LP     | - |

a, reference ranges of the biochemical indicators, PHE 25~90  $\mu\text{mol/L}$ , TSH  $\leq 7.9$  mIU/L, CIT 6~32  $\mu\text{mol/L}$ , C5 0.04~0.35  $\mu\text{mol/L}$ , C14:1 0.03~0.24  $\mu\text{mol/L}$ , EA (G6PD enzyme activity)  $\geq 2.5$  U/gHb. b, the follow-up TSH result is 11.49 mIU/L. c, the follow-up C5 result is 1.05  $\mu\text{mol/L}$ .

**Table S2: Genomic screening LSDs and genes.**

| No. | Disease | Gene        | Genetic model | Diagnostic method                             | Treatment Advances |
|-----|---------|-------------|---------------|-----------------------------------------------|--------------------|
| 1   | MPS I   | <i>IDUA</i> | AR            | Enzyme activity testing +<br>Genetic analysis | ERT, SCT, ST       |
| 2   | MPS II  | <i>IDS</i>  | XLR           | Enzyme activity testing +<br>Genetic analysis | ERT, SCT, ST       |

|    |                                 |                                    |     |                                               |                              |
|----|---------------------------------|------------------------------------|-----|-----------------------------------------------|------------------------------|
| 3  | MPS III (A/B/C)                 | <i>SGSH/<br/>NAGLU/<br/>HGSNAT</i> | AR  | Enzyme activity testing +<br>Genetic analysis | ST, ERT/GT Clinical trials   |
| 4  | MPS IV A                        | <i>GALNS</i>                       | AR  | Enzyme activity testing +<br>Genetic analysis | ERT, ST                      |
| 5  | MPS VI                          | <i>ARSB</i>                        | AR  | Enzyme activity testing +<br>Genetic analysis | ERT, SCT, ST                 |
| 6  | MPS VII                         | <i>GUSB</i>                        | AR  | Enzyme activity testing +<br>Genetic analysis | ST, ERT Clinical trials      |
| 7  | GSD II                          | <i>GAA</i>                         | AR  | Enzyme activity testing +<br>Genetic analysis | ERT, ST                      |
| 8  | Metachromatic<br>leukodystrophy | <i>ARSA</i>                        | AR  | Enzyme activity testing +<br>Genetic analysis | SCT, ST, GT Clinical trials  |
| 9  | GM1 gangliosidosis              | <i>GLBI</i>                        | AR  | Enzyme activity testing +<br>Genetic analysis | ST, GT Clinical trials       |
| 10 | Sandhoff disease                | <i>HEXB</i>                        | AR  | Enzyme activity testing +<br>Genetic analysis | ST, ERT/GT Clinical trials   |
| 11 | Tay-Sachs disease               | <i>HEXA</i>                        | AR  | Enzyme activity testing +<br>Genetic analysis | ST, ERT/GT Clinical trials   |
| 12 | Krabbe disease                  | <i>GALC</i>                        | AR  | Enzyme activity testing +<br>Genetic analysis | SCT, ST, GT Clinical trials  |
| 13 | Fabry disease                   | <i>GLA</i>                         | XLD | Enzyme activity testing +<br>Genetic analysis | ERT, ST, GT Clinical trials  |
| 14 | NPD-A/B                         | <i>SMPD1</i>                       | AR  | Enzyme activity testing +<br>Genetic analysis | SCT, ST, ERT Clinical trials |
| 15 | NPD-C                           | <i>NPC1/<br/>NPC2</i>              | AR  | FILIPIN staining +<br>Genetic analysis        | SRT, ST                      |

Abbreviations: MPS, mucopolysaccharidosis; GSD II, glycogen storage disease type II; NPD, Niemann-Pick disease; AD, autosomal dominant inheritance; AR, autosomal recessive inheritance; XLD, x-linked dominant inheritance; XLR, x-linked recessive inheritance. ERT, enzyme replacement therapy; SRT, substrate reduction therapy; SCT, stem cell therapy; GT, gene therapy; ST, support therapy.

**Tabel S3: Genomic screening diseases and genes list (excluding the LSDs).**

| Category                        | Disease                         | Gene          | Genetic model |
|---------------------------------|---------------------------------|---------------|---------------|
| Amino acid metabolism disorders | Maple syrupurine disease (MSUD) | <i>BCKDHA</i> | AR            |
|                                 |                                 | <i>BCKDHB</i> | AR            |
|                                 |                                 | <i>DBT</i>    | AR            |
|                                 | Tyrosinemia                     | <i>FAH</i>    | AR            |
|                                 |                                 | <i>TAT</i>    | AR            |
|                                 |                                 | <i>HPD</i>    | AR            |
|                                 | Hyperphenylalaninemia (HPA)     | <i>PAH</i>    | AR            |
|                                 |                                 | <i>PTS</i>    | AR            |

|                                        |                                                                    |                 |       |
|----------------------------------------|--------------------------------------------------------------------|-----------------|-------|
|                                        |                                                                    | <i>QDPR</i>     | AR    |
|                                        | Homocysteinemia (HCY)                                              | <i>CBS</i>      | AR    |
|                                        |                                                                    | <i>MTHFR</i>    | AR    |
|                                        | Non-ketotic hyperglycinemia (NKH)                                  | <i>GLDC</i>     | AR    |
|                                        |                                                                    | <i>AMT</i>      | AR    |
|                                        | Hypermethioninemia                                                 | <i>MAT1A</i>    | AR/AD |
|                                        | Hyperprolinemia type 1                                             | <i>PRODH</i>    | AR    |
| Urea cycle disorders                   | Argininemia                                                        | <i>ARG1</i>     | AR    |
|                                        | Argininosuccinic aciduria (ASA)                                    | <i>ASL</i>      | AR    |
|                                        | Carbamoyl phosphate synthetase I deficiency                        | <i>CPS1</i>     | AR    |
|                                        | Ornithine transcarbamylase deficiency (OTCD)                       | <i>OTC</i>      | XLR   |
|                                        | Citrullinemia                                                      | <i>ASS1</i>     | AR    |
|                                        |                                                                    | <i>SLC25A13</i> | AR    |
|                                        | Hyperornithinemia-hyperammonemia-homocitrullinuria syndrome (HHHS) | <i>SLC25A15</i> | AR    |
| Organic acid metabolism disorders      | Methylmalonic acidemia (MMA)                                       | <i>MMAA</i>     | AR    |
|                                        |                                                                    | <i>MMAB</i>     | AR    |
|                                        |                                                                    | <i>MMACHC</i>   | AR    |
|                                        |                                                                    | <i>MMUT</i>     | AR    |
|                                        | Propionic acidemia (PA)                                            | <i>PCCA</i>     | AR    |
|                                        |                                                                    | <i>PCCB</i>     | AR    |
|                                        | Glutaric Acidemia I (GA-1)                                         | <i>GCDH</i>     | AR    |
|                                        | Holocarboxylase synthase deficiency (HCS)                          | <i>HLCS</i>     | AR    |
|                                        | Biotinase deficiency (BTDD)                                        | <i>BTB</i>      | AR    |
|                                        | 3-hydroxy-3-methylglutaryl-coenzyme A lyase deficiency (HMGCL)     | <i>HMGCL</i>    | AR    |
|                                        | Isovaleric acidemia (IVA)                                          | <i>IVD</i>      | AR    |
|                                        | 3-methylcrotonyl-coenzyme A carboxylase deficiency (MCCD)          | <i>MCCC1</i>    | AR    |
|                                        |                                                                    | <i>MCCC2</i>    | AR    |
|                                        | Malonyl-coenzyme A decarboxylase deficiency                        | <i>MLYCD</i>    | AR    |
|                                        | 3-methylpentolenoacidemia type I                                   | <i>AUH</i>      | AR    |
|                                        | 2-methylbutyrylglycinemia                                          | <i>ACADSB</i>   | AR    |
|                                        | Isobutyryl-coenzyme A dehydrogenase deficiency                     | <i>ACAD8</i>    | AR    |
|                                        | $\beta$ -ketothiolase deficiency                                   | <i>ACAT1</i>    | AR    |
|                                        | Succinate hemialdehyde dehydrogenase deficiency (SSADHD)           | <i>ALDH5A1</i>  | AR    |
| Fatty acid $\beta$ oxidation disorders | Very long chain acyl-CoA dehydrogenase deficiency (VLCADD)         | <i>ACADVL</i>   | AR    |
|                                        | Long-chain 3-hydroxyacyl-CoA dehydrogenase deficiency (LCHAD)      | <i>HADHA</i>    | AR    |
|                                        | Trifunctional protein deficiency (TFPD)                            | <i>HADHA</i>    | AR    |

|                                   |        |                                                       |                  |    |
|-----------------------------------|--------|-------------------------------------------------------|------------------|----|
|                                   |        |                                                       | <i>HADHB</i>     | AR |
|                                   |        | Medium chain acyl-CoA dehydrogenase deficiency (MCAD) | <i>ACADM</i>     | AR |
|                                   |        | Short-chain acyl-CoA dehydrogenase deficiency (SCADD) | <i>ACADS</i>     | AR |
|                                   |        | Glutaric acidemia type II (GA-2)                      | <i>ETFDH</i>     | AR |
|                                   |        | Primary carnitine deficiency (PCD)                    | <i>SLC22A5</i>   | AR |
|                                   |        | Carnitine palmitoyltransferase deficiency (CPT)       | <i>CPT1A</i>     | AR |
|                                   |        |                                                       | <i>CPT2</i>      | AR |
|                                   |        | Carnitine-acylcarnitine translocase deficiency (CACT) | <i>SLC25A20</i>  | AR |
|                                   |        | 2,4-Dienoyl-CoA reductase deficiency                  | <i>NADK2</i>     |    |
| Carbohydrate metabolism disorders |        | Glycogen storage disease (GSD)                        | <i>G6PC</i>      | AR |
|                                   |        |                                                       | <i>SLC37A4</i>   | AR |
|                                   |        |                                                       | <i>GAA</i>       | AR |
|                                   |        |                                                       | <i>AGL</i>       | AR |
|                                   |        |                                                       | <i>GBE1</i>      | AR |
|                                   |        |                                                       | <i>PYGM</i>      | AR |
|                                   |        |                                                       | <i>PYGL</i>      | AR |
|                                   |        |                                                       | <i>PHKA2</i>     | AR |
|                                   |        |                                                       | <i>PHKB</i>      | AR |
|                                   |        |                                                       | <i>PHKG2</i>     | AR |
|                                   |        |                                                       | <i>PHKA1</i>     | AR |
|                                   |        |                                                       | <i>PGM1</i>      | AR |
|                                   |        | Galactosemia                                          | <i>GALK1</i>     | AR |
|                                   |        |                                                       | <i>GALT</i>      | AR |
|                                   |        |                                                       | <i>GALE</i>      | AR |
| Lipid metabolism disorders        |        | Sitosterolemia                                        | <i>ABCG8</i>     | AR |
|                                   |        |                                                       | <i>ABCG5</i>     | AR |
|                                   |        | Familial hypercholesterolemia type 1 (FH)             | <i>LDLR</i>      | AD |
| Hematological diseases            | system | $\alpha$ -thalassemia                                 | <i>HBA1/HBA2</i> | AR |
|                                   |        |                                                       | <i>HBA1</i>      | AR |
|                                   |        |                                                       | <i>HBA2</i>      | AR |
|                                   |        | $\beta$ -thalassemia                                  | <i>HBB</i>       | AR |
|                                   |        | Diamond-Blackfan anemia                               | <i>RPS19</i>     | AD |
|                                   |        |                                                       | <i>RPL11</i>     | AD |
|                                   |        |                                                       | <i>RPS26</i>     | AD |
|                                   |        | Fanconi anemia complementary group A                  | <i>FANCA</i>     | AR |

|                          |                                                       |                |       |
|--------------------------|-------------------------------------------------------|----------------|-------|
|                          | Familial Hemophagocytic Lymphohistiocytosis (FHL)     | <i>PRF1</i>    | AR    |
|                          |                                                       | <i>UNC13D</i>  | AR    |
|                          | Glucose-6-phosphate dehydrogenase deficiency          | <i>G6PD</i>    | XLD   |
| Skeletal system diseases | X-linked dominant hereditary hypophosphatemic rickets | <i>PHEX</i>    | XLD   |
| Neuromuscular disease    | Spinal muscular atrophy                               | <i>SMN1</i>    | AR    |
|                          | Pyridoxine-dependent epilepsy (PDE)                   | <i>ALDH7A1</i> | AR    |
|                          | Hereditary spastic paraplegia (HSP)                   | <i>REEP1</i>   | AD    |
|                          |                                                       | <i>ATL1</i>    | AD    |
|                          |                                                       | <i>SPAST</i>   | AD    |
|                          |                                                       | <i>SPG11</i>   | AD    |
|                          | Congenital myotonia                                   | <i>CLCN1</i>   | AD    |
|                          | Duchenne muscular dystrophy (DMD)                     | <i>DMD</i>     | XLR   |
|                          | Tyrosine hydroxylase deficiency (THD)                 | <i>TH</i>      | AR    |
|                          | Glucose transporter 1 deficiency syndrome (GLUT1-DS)  | <i>SLC2A1</i>  | AD    |
|                          | Ohtahara syndrome                                     | <i>SCN1A</i>   | AD    |
|                          |                                                       | <i>PCHD19</i>  | AD    |
| Endocrine disease        | Congenital hypothyroidism (CH)                        | <i>DUOXA2</i>  | AR    |
|                          |                                                       | <i>DUOX2</i>   | AR    |
|                          |                                                       | <i>TSHR</i>    | AR    |
|                          | Congenital adrenal hyperplasia (CAH)                  | <i>CYP11B1</i> | AR    |
|                          |                                                       | <i>CYP17A1</i> | AR    |
|                          | Kallmann syndrome (KS)                                | <i>ANOS1</i>   | XLR   |
|                          |                                                       | <i>FGFR1</i>   | AD    |
|                          |                                                       | <i>PROKR2</i>  | AR/AD |
|                          |                                                       | <i>CHD7</i>    | AD    |
|                          | X-linked adrenal hypoplasia congenit (X-AHC)          | <i>NR0B1</i>   | XLR   |
|                          | Combined pituitary hormone deficiency type 2          | <i>PROP1</i>   | AR    |
|                          | Permanent neonatal diabetes mellitus                  | <i>KCNJ11</i>  | AD    |
|                          |                                                       | <i>ABCC8</i>   | AD/AR |
|                          | Familial hyperinsulinemia                             | <i>ABCC8</i>   | AD/AR |
|                          |                                                       | <i>KCNJ11</i>  | AR    |
|                          |                                                       | <i>INSR</i>    | AD    |
| Intrahepatic cholestasis | Progressive Familial Intrahepatic Cholestasis         | <i>ATP8B1</i>  | AR    |
|                          |                                                       | <i>ABCB11</i>  | AR    |
|                          |                                                       | <i>ABCB4</i>   | AR    |
| Hearing disorder         | Hereditary non-syndromic deafness                     | <i>SLC26A4</i> | AR    |
|                          |                                                       | <i>GJB2</i>    | AR    |
|                          |                                                       | <i>MYO15A</i>  | AR    |



|                                  |                                                                  |                |       |
|----------------------------------|------------------------------------------------------------------|----------------|-------|
|                                  |                                                                  | <i>TMC1</i>    | AR    |
|                                  |                                                                  | <i>TMPRSS3</i> | AR    |
|                                  |                                                                  | <i>OTOF</i>    | AR    |
|                                  |                                                                  | <i>CDH23</i>   | AR    |
|                                  | Usher syndrome                                                   | <i>MYO7A</i>   | AR    |
|                                  |                                                                  | <i>PCDH15</i>  | AR    |
|                                  |                                                                  | <i>USH2A</i>   | AR    |
|                                  | Mitochondrial non-syndromic sensorineural hearing loss (mNSSNHL) | <i>MT-RNR1</i> |       |
| Immunodeficiency disease         | Wiskott-Aldrich syndrome                                         | <i>WAS</i>     | XLR   |
|                                  | X-linked chronic granulomatous disease                           | <i>CYBB</i>    | XLR   |
|                                  | X-linked angammaglobulinemia                                     | <i>BTK</i>     | XLR   |
|                                  | Severe combined immunodeficiency (SCID)                          | <i>IL2RG</i>   | XLR   |
|                                  |                                                                  | <i>RAG1</i>    | AR    |
|                                  | X-linked lymphoproliferative syndrom                             | <i>SH2D1A</i>  | XLR   |
|                                  |                                                                  | <i>XIAP</i>    | XLR   |
|                                  | Familial Mediterranean fever (FMF)                               | <i>MEFV</i>    | AR    |
|                                  | X-linked hyperimmunoglobulin M syndrome (HIM)                    | <i>CD40LG</i>  | XLD   |
| Other metabolic related diseases | Severe congenital neutropenia (SCN)                              | <i>ELANE</i>   | AD    |
|                                  | Bile Acid Synthesis Defect (BASD)                                | <i>HSD3B7</i>  | AR    |
|                                  | Hepatolenticular degeneration (HLD)                              | <i>ATP7B</i>   | AR    |
|                                  | Cerebrotendinous xanthomatosis (CTX)                             | <i>CYP27A1</i> | AR    |
|                                  | Menkes' disease (MD)                                             | <i>ATP7A</i>   | XLR   |
|                                  | Hypophosphatasia (HPP)                                           | <i>ALPL</i>    | AR/AD |
|                                  | Retinoblastoma                                                   | <i>RB1</i>     | AD    |
|                                  | Gitelman syndrome                                                | <i>SLC12A3</i> | AR    |
|                                  | Leber hereditary optic neuropathy (LHON)                         | <i>MT-ND4</i>  |       |
| Other genetic diseases           | X-linked Alport syndrome                                         | <i>COL4A5</i>  | XLD   |
|                                  | Alport syndrome                                                  | <i>COL4A3</i>  | AD    |
|                                  |                                                                  | <i>COL4A4</i>  | AR    |
|                                  | Tuberous sclerosis                                               | <i>TSC1</i>    | AD    |
|                                  |                                                                  | <i>TSC2</i>    | AD    |
|                                  | Cystic fibrosis (CF)                                             | <i>CFTR</i>    | AR    |
|                                  | Co-Enzyme Q10 deficiency type 7                                  | <i>COQ4</i>    | AR    |

Abbreviations: AD, autosomal dominant inheritance; AR, autosomal recessive inheritance; XLD, x-linked dominant inheritance; XLR, x-linked recessive inheritance.

**Table S4: Recommendations for follow-up and treatment initiation in presymptomatic individuals from this study.**

| N<br>o. | Disease                     | Follow-up (intervals)                                                                                                                                                                                                                                                                                                                                                                                                                                                                                                                                                                                                                                                                       | Treatment initiation                                                                                                                                                                                                                                                                                                                       | Reference |
|---------|-----------------------------|---------------------------------------------------------------------------------------------------------------------------------------------------------------------------------------------------------------------------------------------------------------------------------------------------------------------------------------------------------------------------------------------------------------------------------------------------------------------------------------------------------------------------------------------------------------------------------------------------------------------------------------------------------------------------------------------|--------------------------------------------------------------------------------------------------------------------------------------------------------------------------------------------------------------------------------------------------------------------------------------------------------------------------------------------|-----------|
| 1       | Fabry disease               | <p><b>Clinical evaluation:</b><br/>History, physical examination (including auxological evaluation) (annually).</p> <p><b>Laboratory tests:</b><br/>Blood count, urinalysis, 24-hour urine protein or 24-hour urine albumin/creatinine, serum creatinine, GFR estimated by formula, lipid profile (annually).</p> <p><b>Special tests:</b><br/>Pulmonary function testing, ophthalmologic examination, hearing test, pain and quality of life assessment (BPI, SF-36 Scale), ECG, echocardiogram (annually), 24-hour Holter monitor (only if ECG shows abnormalities, once every 1-2 years), cranial MRI and TCD (If no abnormalities, once every 2 years; if abnormalities, annually).</p> | <p><b>Presymptomatic males with severe variants:</b><br/>If there's a family history, low <math>\alpha</math>-Gal A activity, and high Lyso-GL-3 levels.</p> <p><b>Late-onset presymptomatic males/females:</b><br/>If there is laboratory, histological, or imaging evidence of kidney, heart, or central nervous system involvement.</p> | [44]      |
| 2       | Krabbe disease (late onset) | <p><b>Clinical evaluation:</b><br/>History, physical examination (including auxological evaluation) (annually).</p> <p><b>Laboratory tests:</b><br/>Psychosine (if any signs or symptoms occur).</p> <p><b>Special tests:</b><br/>MRI brain, NCS, BAER, LP, VEP (if any signs or symptoms occur, otherwise every 2–5 years).</p>                                                                                                                                                                                                                                                                                                                                                            | <p><b>Presymptomatic individuals:</b><br/>If any signs or symptoms appear along with abnormal laboratory, MRI, or NCS results.</p>                                                                                                                                                                                                         | [35]      |
| 3       | GSD II                      | <p><b>Clinical evaluation:</b><br/>History, physical examination (including auxological evaluation) (annually).</p> <p><b>Laboratory tests:</b><br/>CK (annually)</p> <p><b>Special tests:</b><br/><b>Musculoskeletal:</b> EMG, muscle CT, MRI, or ultrasound (every 1–2 years).<br/><b>Cardiovascular:</b> Chest X-ray, ECG, echocardiogram, cardiac MRI (every 1–2 years).<br/><b>Respiratory:</b> pulmonary function test and sleep monitoring (every 1–2 years).</p>                                                                                                                                                                                                                    | <p><b>Presymptomatic individuals:</b><br/>If any signs or symptoms, including skeletal muscle weakness on examination and respiratory muscle involvement confirmed by pulmonary function tests.</p>                                                                                                                                        | [45,46]   |
| 4       | NPD-A/B                     | <p><b>Clinical evaluation:</b><br/>History, physical examination (including auxological evaluation) (annually).</p> <p><b>Laboratory tests:</b><br/>Blood count, serum chemistries, lipid profile (annually).</p> <p><b>Special tests:</b><br/><b>Respiratory:</b> Chest X-ray/CT (every 2–4 years).</p>                                                                                                                                                                                                                                                                                                                                                                                    | <p><b>Presymptomatic individuals:</b><br/>If visceral or neurologic manifestations appear, treatment may be considered</p>                                                                                                                                                                                                                 | [47,48]   |

|       |        |                                                                                                                                                                                                                                                                                                                                                                                                                                                                                                                                                                                                                                                                                                                                                                                                                                                                                                                                                                                                                                                                                                                                                                                                                                 |                                                                                                                        |      |
|-------|--------|---------------------------------------------------------------------------------------------------------------------------------------------------------------------------------------------------------------------------------------------------------------------------------------------------------------------------------------------------------------------------------------------------------------------------------------------------------------------------------------------------------------------------------------------------------------------------------------------------------------------------------------------------------------------------------------------------------------------------------------------------------------------------------------------------------------------------------------------------------------------------------------------------------------------------------------------------------------------------------------------------------------------------------------------------------------------------------------------------------------------------------------------------------------------------------------------------------------------------------|------------------------------------------------------------------------------------------------------------------------|------|
| <hr/> |        |                                                                                                                                                                                                                                                                                                                                                                                                                                                                                                                                                                                                                                                                                                                                                                                                                                                                                                                                                                                                                                                                                                                                                                                                                                 |                                                                                                                        |      |
|       |        | <p><b>Musculoskeletal:</b> assess for fractures and/or extremity pain (each visit).</p> <p><b>Neurological:</b> comprehensive neurologic evaluation, assess neurologic function and frequency of headaches (annually).</p> <p><b>Cardiovascular:</b> ECG, echocardiogram, coronary angiogram as indicated (adult only, every 3-5 years).</p> <p><b>Visceral:</b> ultrasonography or MRI to assess liver and spleen size (in response to physical examination).</p> <p><b>Developmental or cognitive:</b> document baseline degree of cognitive impairment including motor, adaptive, cognitive and speech/language (6 monthly in children, 12 monthly in adults).</p> <p><b>Neuropsychiatric:</b> document psychiatric manifestations (annually).</p>                                                                                                                                                                                                                                                                                                                                                                                                                                                                           |                                                                                                                        |      |
| 5     | MPS II | <p><b>Clinical evaluation:</b></p> <p>History, physical examination (including auxological evaluation) (annually).</p> <p><b>Special tests:</b></p> <p><b>Neurological:</b> neurobehavioral assessment/cognitive testing, hand function tests (annually); MRI/CT of the head +/- gadolinium, LP measurement of CSF pressure, MRI cervical spine (every 1–3 years); Cervical spine flexion/extension (every 2–3 years, and before general anesthesia); Nerve conduction (at 4–5 years old, then at 1- or 2-year intervals).</p> <p><b>Cardiovascular:</b> ECHO/ECG, Holter (conduction irregularities) (annually)</p> <p><b>Musculoskeletal:</b> JROM (annually), X-ray (spine, hips and pelvis) (Upon diagnosis and thereafter in response to signs and symptoms).</p> <p><b>Respiratory:</b> pulmonary function (chest X-ray, oxygen saturation, sleep study to detect OSA, 6MWT, 3-minute stair climbing test) (Upon diagnosis or when patient is old enough to cooperate, then yearly); Sleep monitoring (every 3–5 years, then upon suspicion of OSA).</p> <p><b>Ophthalmologic:</b> Standard ophthalmologic examination (annually).</p> <p><b>Auditory:</b> otological and audiological examinations (every 6~12month)</p> | <p><b>Presymptomatic individuals:</b></p> <p>If any signs or symptoms appear, seek treatment as early as possible.</p> | [49] |

ECG= electrocardiogram, CT= computed tomography, MRI= magnetic resonance imaging, TCD= transcranial doppler, NCS=nerve conduction study, Psy=psychosine, BAER=brainstem auditory evoked potential, LP=lumbar puncture, VEP = visual evoked potentials, CK=creatinine kinase, EMG=electromyography, 6MWT= 6-minute walk test; CSF= cerebrospinal fluid, ECHO= echocardiogram; EEG= electroencephalography; JROM= joint range of motion; LP= lumbar puncture; OSA= obstructive sleep apnea.

**Table S5: Carrier rate of LSDs.**

| No. | Disease                        | Gene                     | Carrier count | Carrier rate (1/n) |
|-----|--------------------------------|--------------------------|---------------|--------------------|
| 1   | MPS VII                        | <i>GUSD</i>              | 10 (0.73%)    | 0.044% (1/2269)    |
| 2   | MPS VI                         | <i>ARSB</i>              | 17 (1.24%)    | 0.075% (1/1335)    |
| 3   | Sandhoff disease               | <i>HEXB</i>              | 17 (1.24%)    | 0.075% (1/1335)    |
| 4   | Tay-Sachs disease              | <i>HEXA</i>              | 18 (1.32%)    | 0.079% (1/1260)    |
| 5   | MPS IV-A                       | <i>GALNS</i>             | 30 (2.19%)    | 0.132% (1/756)     |
| 6   | GM1 gangliosidosis             | <i>GLB1</i>              | 37 (2.71%)    | 0.163% (1/613)     |
| 7   | Metachromatic leukodystrophies | <i>ARSA</i>              | 55 (4.02%)    | 0.242% (1/412)     |
| 8   | NPD-C                          | <i>NPC1/NPC2</i>         | 57 (4.17%)    | 0.251% (1/398)     |
| 9   | MPS I                          | <i>IDUA</i>              | 60 (4.39%)    | 0.264% (1/378)     |
| 10  | MPS III                        | <i>SGSH/NAGLU/HGSNAT</i> | 110 (8.05%)   | 0.485% (1/206)     |
| 11  | NPD-A/B                        | <i>SMPD1</i>             | 181 (13.24%)  | 0.798% (1/125)     |
| 12  | GSD II                         | <i>GAA</i>               | 195 (14.26%)  | 0.860% (1/116)     |
| 13  | Krabbe                         | <i>GALC</i>              | 580 (42.43%)  | 2.557% (1/39)      |
|     | All                            |                          | 1,367         | 1/17               |

**Table S6: Cut-off value and reference range for lysosomal enzyme activity.**

|                | <b>GALC</b> | <b>GAA</b> | <b>ASM</b> | <b>IDUA</b> | <b>GLA</b>    |
|----------------|-------------|------------|------------|-------------|---------------|
| Median (μM/h)  | 2.15        | 6.09       | 1.96       | 2.22        | 7.78          |
| Mean (μM/h)    | 2.25        | 6.75       | 2.14       | 2.34        | 8.19          |
| 0.2 MOM (μM/h) | 0.43        | 1.22       | 0.39       | 0.44        | 2.33 (0.3MOM) |
| 0.5percentile  | 0.7389      | 1.4467     | 0.99115    | 1.05005     | 3.6457        |
| 99.5percentile | 4.82885     | 15.75905   | 6.4495     | 4.8699      | 16.60315      |

MOM, multiple of the median.

**Table S7: Percentile position of enzyme activity in lysosomal storage disease carriers among negative samples.**

| Negative percentile | <b>GALC</b>                |                        | <b>GAA</b>                 |                        | <b>ASM</b>                 |                        | <b>IDUA</b>                |                        |
|---------------------|----------------------------|------------------------|----------------------------|------------------------|----------------------------|------------------------|----------------------------|------------------------|
|                     | Enzyme activity (μmol/L/h) | Carrier percentage (%) | Enzyme activity (μmol/L/h) | Carrier percentage (%) | Enzyme activity (μmol/L/h) | Carrier percentage (%) | Enzyme activity (μmol/L/h) | Carrier percentage (%) |
| 10                  | 1.289                      | 48.18                  | 3.675                      | 33.99                  | 1.3                        | 51.28                  | 1.45                       | 42.22                  |
| 20                  | 1.55                       | 62.27                  | 4.64                       | 50.98                  | 1.518                      | 59.83                  | 1.688                      | 48.89                  |
| 30                  | 1.737                      | 72.73                  | 5.157                      | 60.13                  | 1.637                      | 64.96                  | 1.87                       | 55.56                  |
| 40                  | 1.94                       | 81.36                  | 5.692                      | 67.32                  | 1.816                      | 72.65                  | 2.086                      | 68.89                  |
| 50                  | 2.15                       | 84.55                  | 6.09                       | 70.59                  | 1.96                       | 76.07                  | 2.215                      | 73.33                  |

**Table S8: FRPs and PPVs in NBGS or Enzyme activity screening across different studies.**

| Disease | NBGS     |         |      | Enzyme activity screening |          |        |        | Reference |
|---------|----------|---------|------|---------------------------|----------|--------|--------|-----------|
|         | Screened | FPR     | PPV  | Region                    | Screened | FPR    | PPV    |           |
|         | newborns |         |      |                           | newborns |        |        |           |
| Krabbe  | 22,687   | 0%      | 100% | Shanghai of               | 50,108   | 0.046% | 28.13% | [10]      |
|         |          |         |      | China                     |          |        |        |           |
|         |          |         |      | New York of               | 550,000  | 0.004% | 8%     | [36]      |
|         |          |         |      | USA                       |          |        |        |           |
| GSD II  | 22,687   | 0.0132% | 25%  | Shanghai of               | 50,108   | 0.584% | 1.01%  | [10]      |
|         |          |         |      | China                     |          |        |        |           |
|         |          |         |      | Taiwan of                 | 191,786  | 0.44%  | 1.83%  | [11]      |
|         |          |         |      | China                     |          |        |        |           |
|         |          |         |      | Taiwan of                 | 402,281  | 1.03%  | 0.62%  | [37]      |
|         |          |         |      | China                     |          |        |        |           |
|         |          |         |      | Taiwan of                 | 473,738  | 0.47%  | 1.25%  | [38]      |
|         |          |         |      | China                     |          |        |        |           |
|         |          |         |      | Taiwan of                 | 132,538  | 0.82%  | 0.37%  | [39]      |
|         |          |         |      | China                     |          |        |        |           |
|         |          |         |      | Japan                     | 297,387  | 0.033% | 7.34%  | [40]      |
|         |          |         |      | Japan                     | 103,204  | 0.215% | 1.33%  | [41]      |
|         |          |         |      | North East                | 44,411   | 0.007% | 25%    | [8]       |
|         |          |         |      | Italy                     |          |        |        |           |

|      |        |    |      |             |        |        |        |      |
|------|--------|----|------|-------------|--------|--------|--------|------|
|      |        |    |      | Missouri of | 43,702 | 0.023% | 44.44% | [6]  |
|      |        |    |      | USA         |        |        |        |      |
|      |        |    |      | Hungary     | 40,024 | 0.14%  | 14.06% | [42] |
|      |        |    |      | Austria     | 34,736 | 0.003% | 80%    | [43] |
| NPD- | 22,687 | 0% | 100% | Shanghai of | 50,108 | 0.002% | 83.33% | [10] |
| A/B  |        |    |      | China       |        |        |        |      |
|      |        |    |      | Hungary     | 40,024 | 0.007% | 40%    | [42] |
|      |        |    |      | Austria     | 34,736 | 0.003% | 0%     | [43] |

**Table S9: Potential onset periods of clinical symptoms for different LSDs.**

| No. | Disease                      | Approximate onset time of clinical symptoms                                                                             |
|-----|------------------------------|-------------------------------------------------------------------------------------------------------------------------|
| 1   | MPS I                        | Classic: 6 months to 1 year old<br>Mild: 3 to 10 years old                                                              |
| 2   | MPS II                       | After 18 months old                                                                                                     |
| 3   | MPS III (A/B/C)              | 1 to 4 years old                                                                                                        |
| 4   | MPS IV A                     | Severe: 1 to 3 years old<br>Mild: adolescence                                                                           |
| 5   | MPS VI                       | Classic: 2 to 3 years old<br>Mild: after 10 years old                                                                   |
| 6   | MPS VII                      | Severe: fetal period to 6 years old<br>Mild: childhood                                                                  |
| 7   | GSD II                       | Infantile: before 1 year old<br>Late-onset: 1 to 60 years old                                                           |
| 8   | Metachromatic leukodystrophy | Infantile: before 2.5 years old<br>Adolescent: 4 to 16 years old<br>Adult: 15 to 62 years old                           |
| 9   | GM1 gangliosidosis           | Early infantile: before 6 months old<br>Late infantile/ adolescent: 6 months to 8 years old<br>Adult: after 8 years old |
| 10  | Sandhoff disease             | Infantile: about 6 months old<br>Adolescent: 1 to 18 years old<br>Adult: after 18 years old                             |
| 11  | Tay-Sachs disease            | Infantile: 4 to 6 months old<br>Adolescent: 1 to 18 years old<br>Adult: after 18 years old                              |

|    |                |                                                                                                                                            |
|----|----------------|--------------------------------------------------------------------------------------------------------------------------------------------|
| 12 | Krabbe disease | Early infantile: 3 to 6 months old<br>Late infantile: 6 months to 3 years old<br>Adolescent: 3 to 8 years old<br>Adult: 10 to 35 years old |
| 13 | Fabry disease  | Classic: childhood<br>Late-onset: 40 to 70 years old                                                                                       |
| 14 | NPD-A/B        | Type A: After 1 year<br>Type B: After 2 years                                                                                              |
| 15 | NPD-C          | Infantile: fetal period to 6 years old<br>Adolescent: 6 to 15 years old<br>Adult: after 15 years old                                       |

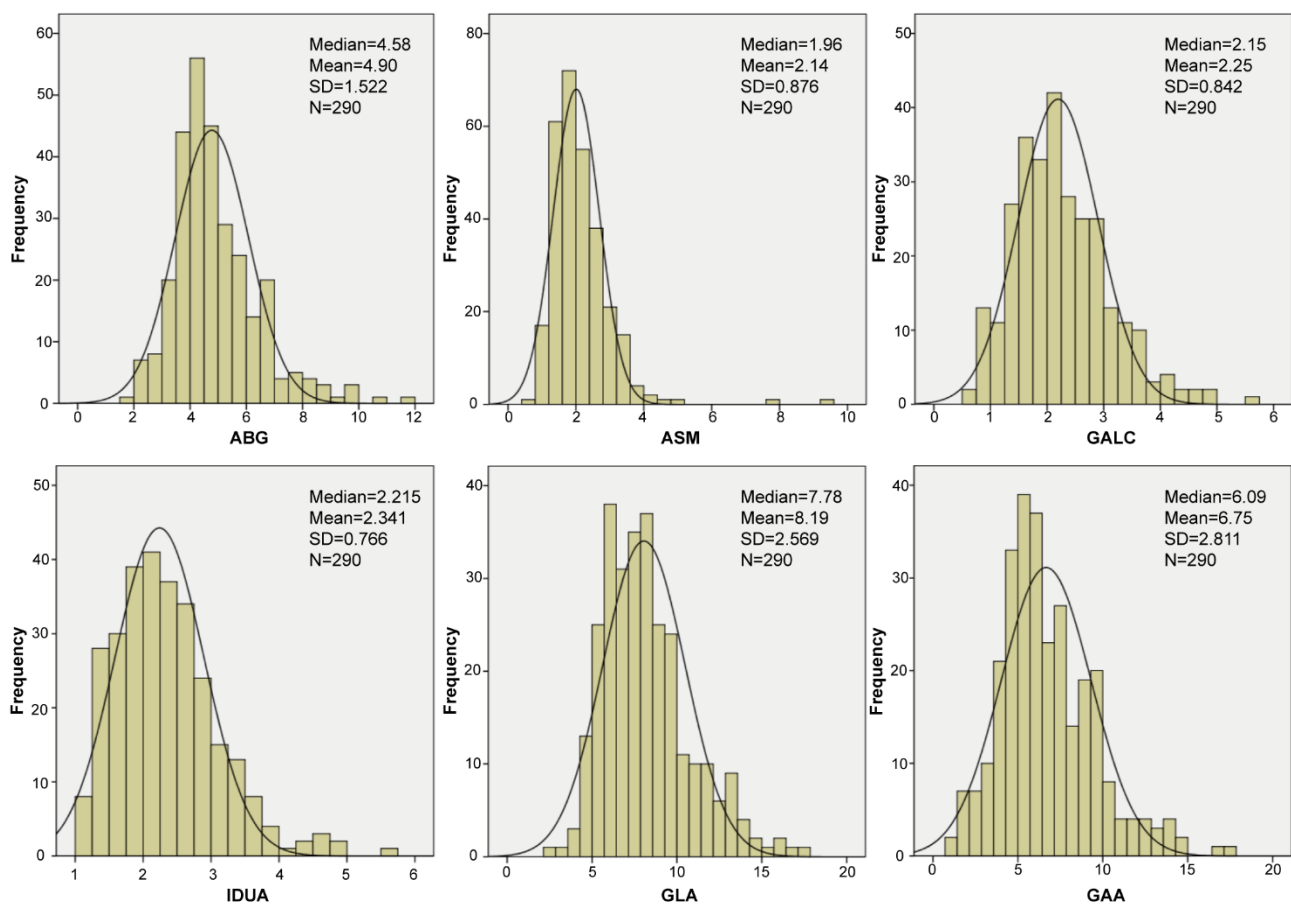

**Fig S1. Histogram representation and statistical data of the distribution of enzymatic activity in healthy newborns.**

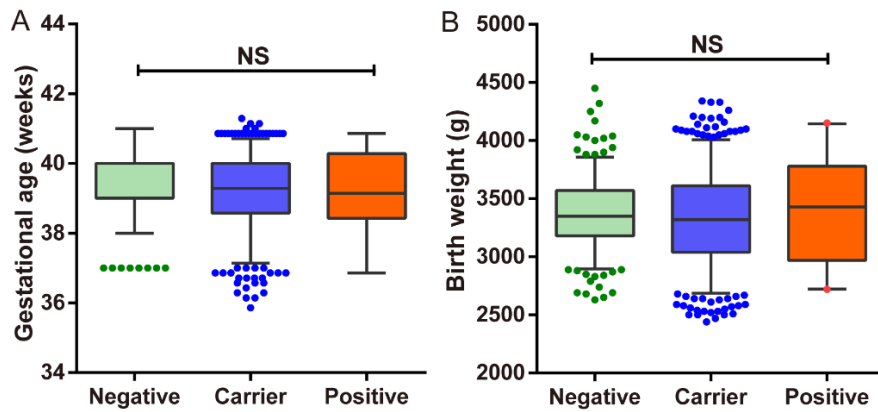

Fig S2. Statistical analysis of gestational age and birth weight in samples for enzyme activity detection. NS, not significant.

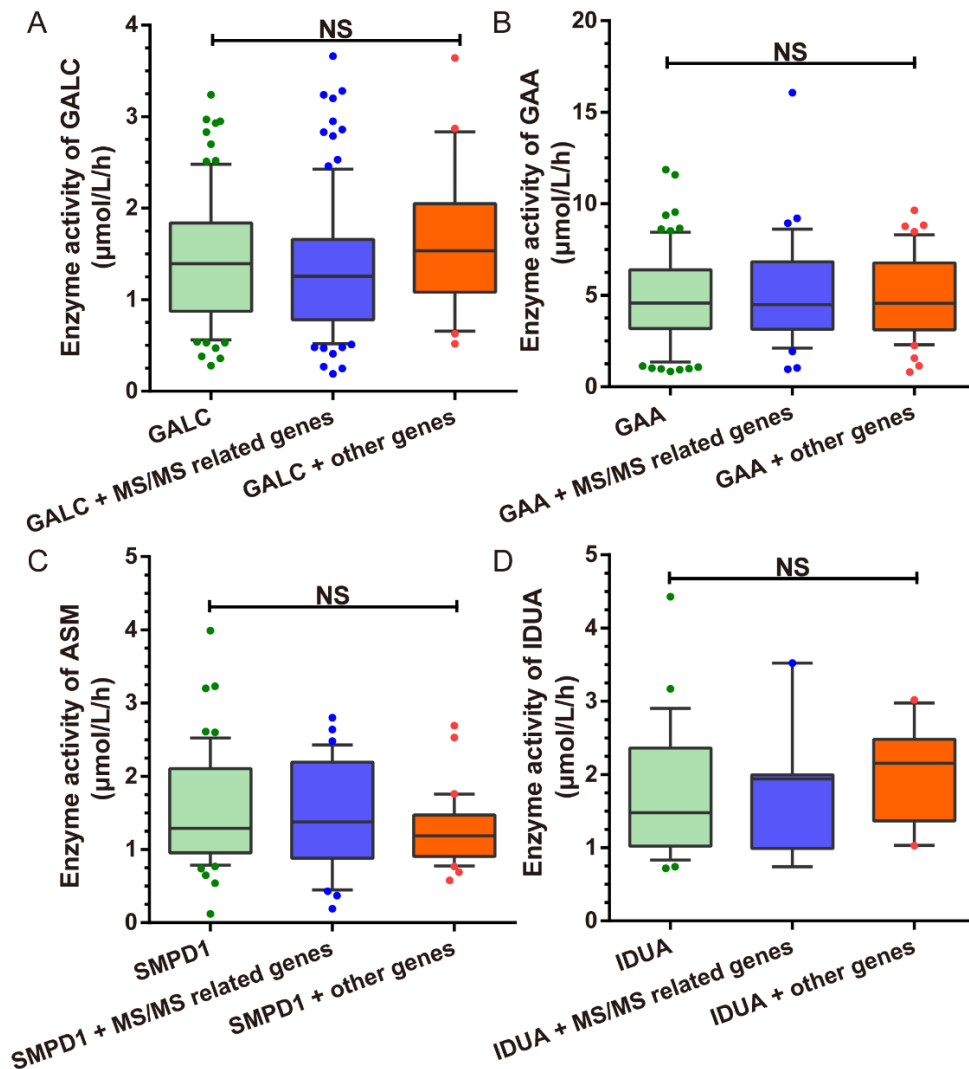

Fig S3. The influence of carrying both lysosomal storage disorders genes and other disease genes on enzyme activity results. (A) Carrying GALC and other genes. (B) Carrying GAA and other genes. (C) Carrying ASM and other genes. (D) Carrying IDUA and other genes. NS, not significant.
